# Supplementary material for: Indoleamine 2,3-Dioxygenase Activity During Acute Toxoplasmosis and the Suppressed T Cell Proliferation in Mice
Source: PubMed Central journal article supplement (PMC6561234; doi:10.3389/fcimb.2019.00184), 2019-06-05
Supplement: Data_Sheet_1.pdf [file Data_Sheet_1.pdf]

## *Supplementary Material*

# **Indoleamine 2,3-Dioxygenase Activity During Acute Toxoplasmosis and the Suppressed T Cell Proliferation in Mice**

**Christoph-Martin Ufermann<sup>1†</sup>, Andreas Domröse<sup>1†</sup>, Timo Babel<sup>1</sup>, Anne Tersteegen<sup>1</sup>, Sevgi Can Cengiz<sup>2</sup>, Silvia Kathrin Eller<sup>1</sup>, Katrin Spekker-Bosker<sup>1</sup>, Ursula Regina Sorg<sup>1</sup>, Irmgard Förster<sup>2</sup>, Walter Däubener<sup>1\*</sup>**

<sup>1</sup> Institute of Medical Microbiology and Hospital Hygiene, Heinrich-Heine-University Düsseldorf, Düsseldorf, Germany

<sup>2</sup> Immunology and Environment, Life & Medical Sciences (LIMES) Institute, University of Bonn, Bonn, Germany.

**†These authors have contributed equally to this work**

### **\*Correspondence:**

Prof. Dr. Walter Däubener  
Institute of Medical Microbiology and Hospital Hygiene  
Heinrich-Heine-University Düsseldorf  
Universitätsstr. 1, Bldg. 22.21  
40225 Düsseldorf, Germany  
Phone: +49 (0) 211-81-12464  
Fax: +49 (0) 211-81-15906  
e-mail: daubene@uni-duesseldorf.de

| <b>Content</b>                                                                                                     | <b>Page</b> |
|--------------------------------------------------------------------------------------------------------------------|-------------|
| <b>Supplementary Table S1 Oligonucleotides used in this study</b>                                                  | <b>S-2</b>  |
| <b>Supplementary Figure S1 Expression of miNOS in murine lung tissue during <i>Toxoplasma gondii</i> infection</b> | <b>S-3</b>  |
| <b>Supplementary Figure S2 Mitogen induced lymphocytes proliferation responses in murine splenocytes</b>           | <b>S-5</b>  |

Supplementary Table S1 Oligonucleotides used in this study.

| Gene expression     |                                     |                |
|---------------------|-------------------------------------|----------------|
| Primer Name         | Primer Sequence [5'->3']            | Roche Probe ID |
| m $\beta$ -actin-fw | TGACAGGATGCAGAAGGAGA                | 106            |
| m $\beta$ -actin-rv | CGCTCAGGAGGAGCAATG                  |                |
| mGBP2-fw            | TGAGTACCTGGAACATTCCTGAC             | 17             |
| mGBP2-rv            | AGTCGCGGCTCATTAAGC                  |                |
| mIDO1-fw            | GGGCTTCTTCCTCGTCTCTC                | 2              |
| mIDO1-rv            | TGGATACAGTGGGGATTGCT                |                |
| mIDO2-fw            | GTCCTTGGGGAGATAACCACA               | 12             |
| mIDO2-rv            | CCAAGGCTTGTAATGATCTGG               |                |
| miNOS-fw            | CTTTGCCACGGACGAGAC                  | 13             |
| miNOS-rv            | TGTACTCTGAGGGCTGACACA               |                |
| Parasite load       |                                     |                |
| Primer Name         | Primer Sequence [5'->3']            |                |
| <i>TgB1</i> -fw     | GCTAAAGGCGTCATTGCTGTT               |                |
| <i>TgB1</i> -rv     | GGCGGAACCAACGGAAAT                  |                |
| <i>TgB1</i> -probe  | FAM-ATCGCAACGGAGTTCTTCCCAGACGT-BHQ1 |                |

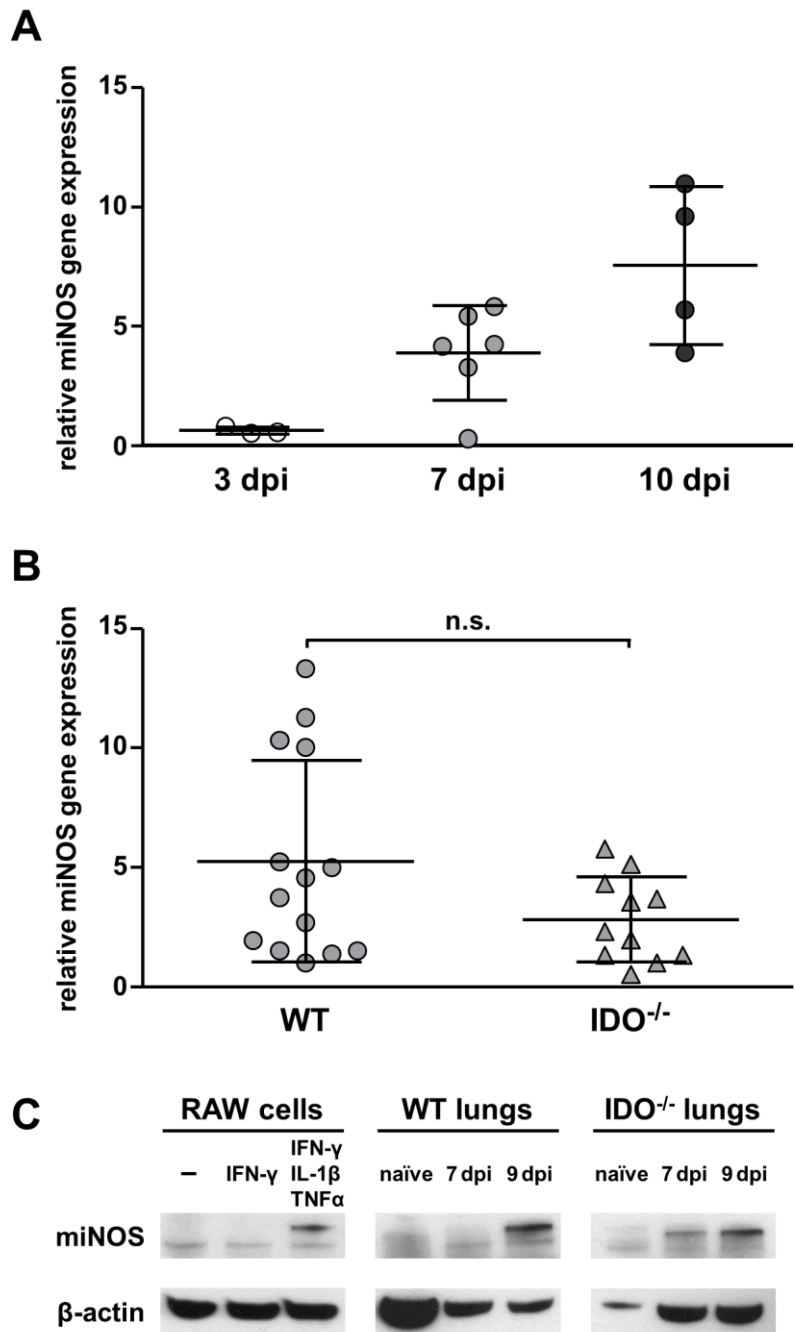

**Supplementary Figure S1 Expression of miNOS in murine lung tissue during *Toxoplasma gondii* infection.** Gene and protein expression of murine inducible nitric oxide synthase (miNOS) in tissues from naïve or *T. gondii* ME49 infected wild-type (WT) and indoleamine 2,3-dioxygenase 1-deficient (IDO<sup>-/-</sup>) mice at different time points post infection. Expression of miNOS in lung tissue homogenates of infected mice relative to their expression in naïve control samples on 3, 7 and 10 days post infection (dpi) (A). Expression of miNOS in lung tissue homogenates of infected WT and IDO<sup>-/-</sup> mice relative to their expression in naïve control samples at day 7 post infection (dpi) (B). Western blot analysis shows miNOS and  $\beta$ -actin protein in lung tissue of naïve and infected WT and IDO<sup>-/-</sup> mice as well as untreated (-) and stimulated (IFN- $\gamma$  100 U/mL or IFN- $\gamma$  100 U/mL + IL-1 $\beta$  100 U/mL + TNF $\alpha$  100 U/mL) RAW 264.7 cells as negative and positive controls respectively (C). IFN- $\gamma$ , IL-1 $\beta$ , TNF $\alpha$

were purchased from R&D Systems (Minneapolis, USA). qPCR data were normalized to the housekeeping gene  $\beta$ -actin and were represented as  $2^{-\Delta\Delta CT}$  (naïve vs. infected) in scattered dot plots and means  $\pm$  standard deviation. The Student's *t*-test (unpaired, two-tailed) was used to determine statistical differences marked with asterisks (n.s. = not significant).

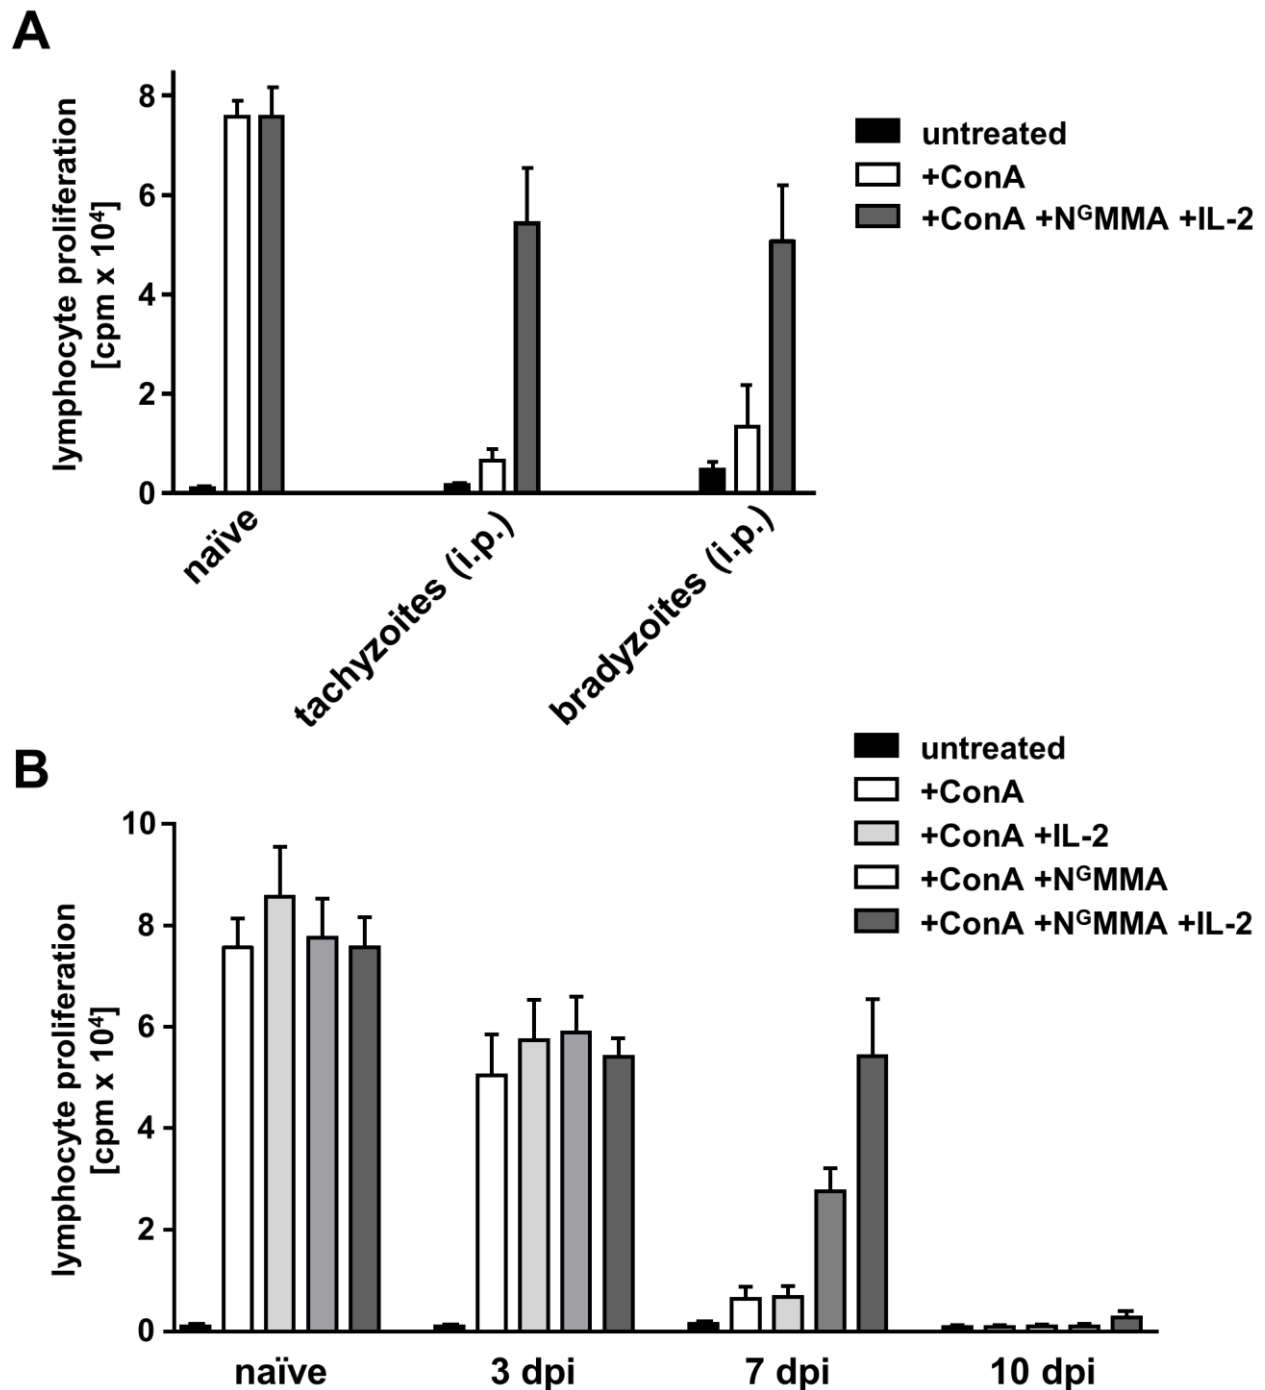

**Supplementary Figure S2 Mitogen induced lymphocytes proliferation responses in murine splenocytes.** Splenocytes were isolated from uninfected (naïve; n = 3) or *T. gondii* ME49 tachyzoite (intraperitoneal (i.p.) dose:  $10^5$  tachyzoites; n = 3) or bradyzoite (i.p. dose: 20 lysed cysts; n = 3) infected C57BL/6 wild-type (WT) mice at 7 days post infection (dpi) (A). Splenocytes were isolated from uninfected (naïve; n = 3) or *T. gondii* ME49 tachyzoite infected (i.p. dose:  $10^5$  tachyzoites) WT mice at 3 dpi (n = 3), 7 dpi (n = 3) and 10 dpi (n = 3) (B). Splenic T cell cultures were stimulated with the mitogen concanavalin A (ConA, 1  $\mu$ g/mL) *ex vivo*. Additional supplementation of recombinant interleukin-2 (IL-2, 5 ng/mL) and the nitric oxide synthase (NOS) inhibitor

N<sup>G</sup>-monomethyl-L-arginine (N<sup>G</sup>MMA, 100 μg/mL) was done as indicated. Lymphocyte proliferation was determined with the <sup>3</sup>H-thymidine method. Data were represented as means of triplicate measurements + standard error of the mean of one experiment.
